# Supplementary material for: Asymmetric Dopamine Transporter Loss Affects Cognitive and Motor Progression in Parkinson's Disease
Source: PubMed Central journal article supplement — Mov Disord. 2021 Jun 14;36(10):2303–13. doi: 10.1002/mds.28682 (PMC8596815; doi:10.1002/mds.28682), 2021-06-14
Supplement: MDS-36-2303-s001.pdf [file MDS-36-2303-s001.pdf]

## SUPPORTING INFORMATION

### **Asymmetric dopamine transporter loss affects cognitive and motor progression in Parkinson's disease**

Eleonora Fiorenzato, PhD, PsyD,<sup>1</sup> Angelo Antonini, MD, PhD,<sup>2\*</sup> Patrizia Bisiacchi, PhD,<sup>1</sup> Luca Weis, PhD,<sup>2</sup> Roberta Biundo, PhD, PsyD<sup>1</sup>

<sup>1</sup>Department of General Psychology, University of Padua, Padua, Italy.

<sup>2</sup>Movement Disorders Unit, Department of Neuroscience, University of Padua, Padua, Italy.

#### **\*Corresponding author:**

Angelo Antonini, MD, PhD

Movement Disorders Unit, Department of Neuroscience, University of Padua

Via Giustiniani, 3 - 35128 Padua, Italy

Phone: +39 049 8216393; e-mail: [angelo3000@yahoo.com](mailto:angelo3000@yahoo.com)

#### **Summary:**

- Supporting methods
- Supporting Tables: Table e-1; Table e-2; Table e-3, Table e-4

## SUPPORTING METHODS

### *DAT-SPECT – additional methodological details*

The reconstructed data was transferred to the PMOD (PMOD Technologies, Zurich, Switzerland) for processing purposes. Site-specific attenuation correction was applied to the reconstructed data by means of an automated ellipse drawing method and Chang's zero attenuation correction using an attenuation coefficient,  $\mu$ , which was empirically derived from the phantom data acquired during the technical site visit. Hermes (Hermes Medical Solutions, Stockholm, Sweden) and PMOD (PMOD Technologies, Zurich, Switzerland) were used as brain software for quantification. After the attenuation correction step, a standard Gaussian 3D 6.0 mm filter was applied, and spatial normalization was performed in PMOD software, normalizing these files to the standard Montreal Neurologic Institute space to enable the same anatomical alignment for all scans.

Then, the transaxial slice with the highest striatal uptake was identified, and the eight hottest striatal slices around it were averaged to generate a single slice image. Count densities were extracted and used to calculate striatal specific binding ratios (SBRs) for each of the four striatal regions, based on this formula:  $SBR = (\text{striatal region})/(\text{occipital})-1$ . Images were checked for registration accuracy.

## SUPPORTING TABLES

**Table e-1** Age-normative data (mean and SD) based on the healthy control sample of PPMI dataset: at baseline, 2- and 4-year follow-up

| Age ranges<br>(years)      | Baseline         |                  |                  |                 | Follow-up        |                  |                  |                  |                  |                  |                  |                  |
|----------------------------|------------------|------------------|------------------|-----------------|------------------|------------------|------------------|------------------|------------------|------------------|------------------|------------------|
|                            | 30-45            | 46-60            | 61-75            | 76-90           | 2-year           |                  |                  |                  | 4-year           |                  |                  |                  |
|                            |                  |                  |                  |                 | 30-45            | 46-60            | 61-75            | 76-90            | 30-45            | 46-60            | 61-75            | 76-90            |
| <i>n</i>                   | 23               | 66               | 85               | 11              | 15               | 55               | 81               | 15               | 10               | 41               | 81               | 22               |
| MoCA#                      | 28.44<br>(1.26)  | 28.07<br>(1.11)  | 28.00<br>(1.10)  | 27.83<br>(1.27) | 28.4<br>(1.64)   | 27.73<br>(2.20)  | 26.48<br>(2.43)  | 27.00<br>(2.14)  | 28.40<br>(1.51)  | 27.98<br>(1.77)  | 27.32<br>(2.48)  | 26.64<br>(2.72)  |
| Benton JLO                 | 26.70<br>(3.44)  | 26.88<br>(3.37)  | 25.60<br>(4.50)  | 25.27<br>(4.59) | 23.87<br>(7.76)  | 26.98<br>(3.17)  | 25.41<br>(5.45)  | 25.2<br>(4.65)   | 26.60<br>(3.53)  | 26.15<br>(5.61)  | 25.58<br>(4.95)  | 24.00<br>(6.76)  |
| HVLT-R<br>Immediate Recall | 26.57<br>(4.69)  | 27.15<br>(4.33)  | 25.34<br>(4.58)  | 24.36<br>(4.65) | 29.00<br>(4.41)  | 27.49<br>(4.51)  | 25.05<br>(5.09)  | 23.33<br>(4.85)  | 30.60<br>(4.01)  | 27.37<br>(5.13)  | 26.11<br>(4.38)  | 22.91<br>(5.71)  |
| HVLT-R<br>Delayed Recall   | 10.04<br>(2.03)  | 9.47<br>(2.38)   | 8.95<br>(2.38)   | 9.00<br>(2.53)  | 11.20<br>(0.86)  | 9.67<br>(2.37)   | 8.96<br>(2.45)   | 7.87<br>(2.88)   | 11.00<br>(1.70)  | 9.80<br>(2.04)   | 8.99<br>(2.49)   | 7.64<br>(2.38)   |
| HVLT-R<br>Recognition      | 11.7<br>(0.56)   | 11.55<br>(0.79)  | 11.39<br>(0.86)  | 11.36<br>(1.21) | 11.87<br>(0.35)  | 11.64<br>(0.8)   | 11.38<br>(1.47)  | 10.73<br>(2.82)  | 11.60<br>(0.70)  | 11.61<br>(0.83)  | 11.47<br>(1.48)  | 10.73<br>(1.64)  |
| LNS                        | 12.26<br>(2.14)  | 11.02<br>(2.49)  | 10.45<br>(2.79)  | 10.09<br>(2.3)  | 13.80<br>(3.17)  | 11.55<br>(2.16)  | 10.20<br>(2.27)  | 10.20<br>(2.24)  | 13.00<br>(3.33)  | 11.85<br>(2.84)  | 10.43<br>(2.54)  | 10.05<br>(2.48)  |
| SDMT                       | 56.26<br>(10.54) | 50.45<br>(9.69)  | 43.06<br>(8.81)  | 37.18<br>(7.78) | 61.60<br>(11.96) | 50.44<br>(8.73)  | 43.44<br>(8.09)  | 35.93<br>(7.40)  | 67.70<br>(11.97) | 51.05<br>(9.53)  | 44.48<br>(7.98)  | 36.55<br>(7.53)  |
| Semantic fluency           | 52.65<br>(10.93) | 54.89<br>(10.48) | 50.52<br>(11.84) | 46.27<br>(9.48) | 55.80<br>(10.83) | 55.31<br>(11.31) | 51.93<br>(11.22) | 47.47<br>(13.83) | 61.00<br>(12.53) | 56.76<br>(11.33) | 49.91<br>(10.22) | 46.09<br>(12.35) |

*Note:* Values are mean and SD. # Sample 30-45 (n = 25), 46-60 (n = 70), 61-75 (n = 89), 76-90 (n = 12). MoCA, Montreal Cognitive Assessment; JLO, Judgment of Line Orientation; HVLT-R, The Hopkins Verbal Learning Test-Revised, LNS, Letter Number Sequencing; SDMT, Symbol Digit Modalities Test.

**Table e-2** Neuropsychological features of PD patients

|                                   | <b>PD-right</b> | <b>PD-left</b> | <b>F</b> | <b>P value</b> |
|-----------------------------------|-----------------|----------------|----------|----------------|
| MoCA, corrected score#            | 27.06 (2.48)    | 27.29 (2.25)   | 0.251    | 0.617          |
| Z scores§                         |                 |                |          |                |
| Benton JLO                        | -0.19 (1.02)    | -0.16 (1.06)   | 0.001    | 0.969          |
| HVLТ-R Immediate Recall           | -0.44 (0.96)    | -0.27 (1.09)   | 0.727    | 0.395          |
| HVLТ-R Delayed Recall             | -0.45 (0.96)    | -0.28 (1.02)   | 1.197    | 0.275          |
| HVLТ-R Discrimination Recognition | -0.37 (1.34)    | -0.26 (1.55)   | <0.001   | 0.986          |
| LNS                               | 0.01 (0.90)     | -0.12 (1.02)   | 1.345    | 0.247          |
| SDMT                              | -0.36 (1.10)    | -0.62 (0.90)   | 6.628    | <b>0.011</b>   |
| Semantic fluency                  | -0.35 (1.00)    | -0.33 (1.05)   | 0.002    | 0.963          |

*Note.* # PD-right n=106 and PD-left n=143. § PD-right n=102 and PD-left n=136. PD-right, PD right putaminal asymmetry; PD-left, PD with left putaminal asymmetry; MoCA, Montreal Cognitive Assessment; JLO, Judgment of Line Orientation; HVLТ-R, The Hopkins Verbal Learning Test-Revised, LNS, Letter Number Sequencing; SDMT, Symbol Digit Modalities test. MDS-UPDRS-III was used as covariate, if pertinent.

**Table e-3** Mixed model analysis results for clinical, neuropsychological and imaging measures

|                                           | <i>F</i> | Num df | Den df  | <i>p</i>     |
|-------------------------------------------|----------|--------|---------|--------------|
| <u><i>Clinical measures</i></u>           |          |        |         |              |
| <b>MDS-UPDRS (<i>motor score</i>)</b>     |          |        |         |              |
| Time                                      | 13.45    | 2      | 398.02  | < .001       |
| Asymmetry                                 | 5.31     | 1      | 239.5   | <b>0.022</b> |
| Asymmetry × Time                          | 0.43     | 2      | 398.02  | 0.654        |
| <b>Conditional R<sup>2</sup> = .52</b>    |          |        |         |              |
| <b>LEDD</b>                               |          |        |         |              |
| Time                                      | 314.54   | 2      | 441.97  | < .001       |
| Asymmetry                                 | 2.04     | 1      | 247.08  | 0.154        |
| Asymmetry × Time                          | 1.9      | 2      | 441.97  | 0.151        |
| <b>Conditional R<sup>2</sup> = .57</b>    |          |        |         |              |
| <b>CSF - Aβ<sub>42</sub></b>              |          |        |         |              |
| Time                                      | 5.26     | 2      | 286.35  | <b>0.006</b> |
| Asymmetry                                 | 4.46     | 1      | 233.24  | <b>0.036</b> |
| Asymmetry × Time                          | 0.08     | 2      | 286.35  | 0.41         |
| <b>Conditional R<sup>2</sup> = .83</b>    |          |        |         |              |
| <u><i>Neuropsychological measures</i></u> |          |        |         |              |
| <b>SDMT (<i>z-scores</i>)</b>             |          |        |         |              |
| Time                                      | 4.84     | 2      | 396.91  | <b>0.046</b> |
| Asymmetry                                 | 2.93     | 1      | 245.55  | <b>0.032</b> |
| Asymmetry × Time                          | 0.08     | 2      | 375.62  | 0.825        |
| <b>Conditional R<sup>2</sup> = .64</b>    |          |        |         |              |
| <u><i>DAT imaging</i></u>                 |          |        |         |              |
| <b>DAT-SPECT (<i>mean putamen</i>)</b>    |          |        |         |              |
| Time                                      | 226.85   | 2      | 359.154 | < .001       |
| Asymmetry                                 | 1.753    | 1      | 241.545 | 0.187        |
| Asymmetry × Time                          | 5.087    | 2      | 359.154 | <b>0.007</b> |
| <b>Conditional R<sup>2</sup> = .80</b>    |          |        |         |              |
| <b>DAT-SPECT (<i>mean caudate</i>)</b>    |          |        |         |              |
| Time                                      | 249.51   | 2      | 358.44  | < .001       |
| Asymmetry                                 | 0.79     | 1      | 244.87  | 0.374        |
| Asymmetry × Time                          | 3.16     | 2      | 358.44  | <b>0.044</b> |
| <b>Conditional R<sup>2</sup> = .86</b>    |          |        |         |              |

**Table e-4** Mixed model analysis results for hemispheric striatal DAT-SPECT measures

|                                        | <i>F</i> | Num df | Den df | <i>p</i> |
|----------------------------------------|----------|--------|--------|----------|
| <b>Putamen - left</b>                  |          |        |        |          |
| Time                                   | 174.76   | 2      | 361.37 | <.001    |
| Asymmetry                              | 50.37    | 1      | 240.53 | <.001    |
| Asymmetry × Time                       | 63.57    | 2      | 361.37 | <.001    |
| <b>Conditional R<sup>2</sup> = .80</b> |          |        |        |          |
| <b>Putamen - right</b>                 |          |        |        |          |
| Time                                   | 166.12   | 2      | 361.43 | <.001    |
| Asymmetry                              | 80.36    | 1      | 242.22 | <.001    |
| Asymmetry × Time                       | 21.82    | 2      | 361.43 | <.001    |
| <b>Conditional R<sup>2</sup> = .82</b> |          |        |        |          |
| <b>Caudate - left</b>                  |          |        |        |          |
| Time                                   | 216.73   | 2      | 360.02 | <.001    |
| Asymmetry                              | 20.09    | 1      | 245.01 | <.001    |
| Asymmetry × Time                       | 7.04     | 2      | 360.02 | .001     |
| <b>Conditional R<sup>2</sup> = .84</b> |          |        |        |          |
| <b>Caudate - right</b>                 |          |        |        |          |
| Time                                   | 206.63   | 2      | 358.75 | <.001    |
| Asymmetry                              | 36.11    | 1      | 244.52 | <.001    |
| Asymmetry × Time                       | 1.02     | 2      | 358.75 | .360     |
| <b>Conditional R<sup>2</sup> = .86</b> |          |        |        |          |
